# Supplementary material for: Integrity of SRP RNA is ensured by La and the nuclear RNA quality control machinery
Source: PubMed Central journal article supplement (PMC4176351; doi:10.1093/nar/gku761), 2014-08-26
Supplement: supp_gku761_Leung_etal_supplementary.pdf [file supp_gku761_Leung_etal_supplementary.pdf]

**SUPPLEMENTARY METHODS:** Plasmid construction

Low (centromeric, pJNY347) and high (2 $\mu$ , pJNY339) copy plasmids containing *LHP1* (with promoter and terminator regions, amplified from genomic DNA) were constructed in pRS315 (77) and pRS425 (78) respectively. *LHP1*<sup>F51A</sup> was generated by PCR. 2 fragments were amplified from plasmid pJNY339 using T7 promoter primer plus BSAI51Aup (5'-CCAGGGTCTCGCGCAACGCCCTGTCATATGGAAAGTTG; BsaI site in italics altered codon 51 underlined) and T3 promoter primer plus BSAI51Ado (5'-CCAGGGTCTCTTGCGCACAACAGCG). These fragments were digested with BsaI, ligated and cloned into pRS425. Cloned fragments were sequenced to confirm accuracy.

**SUPPLEMENTARY TABLE S1:** Yeast strains used in this study.

| Strain | Genotype                                                                                                                                                                        | Reference/Source |
|--------|---------------------------------------------------------------------------------------------------------------------------------------------------------------------------------|------------------|
| JDY3   | MAT $\alpha$ , <i>trp1</i> , <i>ura3</i> , <i>ade2</i> , <i>his3</i> , <i>lys2</i>                                                                                              | (59)             |
| JDY8   | <i>sec65<math>\Delta</math>::HIS3</i> , [ <i>rho</i> -], otherwise as JDY3                                                                                                      | (79)             |
| JDY44  | <i>srp21<math>\Delta</math>::HIS3</i> , [ <i>rho</i> -], otherwise as JDY3                                                                                                      | (59)             |
| JDY66  | <i>srp14<math>\Delta</math>::HIS3</i> , [ <i>rho</i> -], otherwise as JDY3                                                                                                      | (59)             |
| JDY97  | <i>srp68<math>\Delta</math>::HIS3</i> , [ <i>rho</i> -], otherwise as JDY3                                                                                                      | (59)             |
| JDY99  | <i>srp72<math>\Delta</math>::HIS3</i> , [ <i>rho</i> -], otherwise as JDY3                                                                                                      | (59)             |
| JDY103 | <i>scr1<math>\Delta</math>::HIS3</i> , [ <i>rho</i> -], otherwise as JDY3                                                                                                       | (59)             |
| JDY335 | MAT $\alpha$ , <i>srp14::HIS3</i> , [ <i>rho</i> -], <i>trp1-1</i> , <i>ura3-1</i> , <i>ade2-1</i> , <i>his3-11</i> , -15, <i>leu2-3</i> , -112, <i>can1-100</i>                | This study       |
| JDY483 | MAT $\alpha$ , <i>trp1-1</i> , <i>ura3-1</i> , <i>ade2-1</i> , <i>his3-11</i> , -15, <i>leu2-3</i> , -112, <i>can1-100</i> , <i>scr1<math>\Delta</math>::TRP1</i> , pRS316-SCR1 | (57)             |
| JDY596 | <i>srp72::GFP-kanMX3</i> , otherwise as JDY3                                                                                                                                    | This study       |
| JDY618 | MAT $\alpha$ , <i>mtr4-1</i> , <i>ura3-52</i> , <i>lys2-801</i> , <i>pep4::HIS3</i> , <i>prb1-<math>\Delta</math>1-6R</i> , GAL+                                                | Alan Tartakoff   |
| JDY721 | MAT $\alpha$ , <i>ura3-1</i> , <i>ade2-1</i> , <i>his3-11</i> , -15, <i>leu2-3</i> , -112, <i>can1-100</i> , <i>trp1-1::(TRP1, GFP-MS2)</i>                                     | This study       |
| JDY726 | MAT $\alpha$ , <i>ura3-1</i> , <i>ade2-1</i> , <i>his3-11</i> , -15, <i>leu2-3</i> , -112, <i>can1-100</i> , <i>trp1-1::(TRP1, GFP-MS2)</i> , <i>scr1::MS2X6-HIS3</i>           | This study       |
| JDY895 | MAT $\alpha$ , <i>his3<math>\Delta</math>1</i> , <i>leu2<math>\Delta</math>0</i> , <i>met15<math>\Delta</math>0</i> , <i>ura3<math>\Delta</math>0</i>                           | (80)             |
| JDY898 | <i>trf4<math>\Delta</math>::kanMX6</i> , <i>HisMX6-pGAL-3HA::trf5</i> , otherwise as JDY895                                                                                     | (14)             |
| JDY899 | <i>air2<math>\Delta</math>::kanMX4</i> , otherwise as JDY895                                                                                                                    | (11)             |

|         |                                                                                                                        |            |
|---------|------------------------------------------------------------------------------------------------------------------------|------------|
| JDY900  | <i>air1Δ::kanMX4</i> , otherwise as JDY895                                                                             | (11)       |
| JDY901  | <i>air1Δ::kanMX4</i> , <i>air2Δ::natMX6</i> , otherwise as JDY895                                                      | (11)       |
| JDY906  | <i>rrp6Δ::HIS3MX6</i> , otherwise as JDY483                                                                            | This study |
| JDY910  | <i>lhp1Δ::HIS3MX6</i> , otherwise as JDY483                                                                            | This study |
| JDY911  | <i>trf4Δ::HIS3MX6</i> , otherwise as JDY483                                                                            | This study |
| JDY912  | <i>trf5Δ::HIS3MX6</i> , otherwise as JDY483                                                                            | This study |
| JDY974  | <i>rex1Δ::kanMX6</i> otherwise as JDY895                                                                               | Euroscarf  |
| JDY978  | <i>lsm1Δ::kanMX4</i> , otherwise as JDY895                                                                             | Jean Beggs |
| JDY981  | <i>lsm6Δ::hphMX6</i> , otherwise as JDY895                                                                             | Jean Beggs |
| JDY982  | <i>lsm7Δ::hphMX6</i> , otherwise as JDY895                                                                             | Jean Beggs |
| JDY983  | <i>lsm5Δ::hphMX6</i> , otherwise as JDY895                                                                             | Jean Beggs |
| JDY984  | <i>lsm4Δ::kanMX4</i> , otherwise as JDY895                                                                             | Jean Beggs |
| JDY990  | <i>natNT2-pGAL(S)::mtr4</i> , otherwise as JDY483                                                                      | This study |
| JDY1015 | <i>natNT2-pGAL(L)::rrp44</i> , otherwise as JDY483                                                                     | This study |
| JDY1018 | <i>natNT2-pGAL(L)::lhp1</i> , otherwise as JDY483                                                                      | This study |
| JDY1028 | <i>rex1Δ::natNT2</i> , otherwise as JDY483                                                                             | This study |
| JDY1042 | <i>lhp1Δ::HIS3MX6</i> , <i>rex1Δ::natMX6</i> , otherwise as JDY483                                                     | This study |
| JDY1058 | <i>natNT2-pGAL(L)::lhp1</i> , <i>trf4Δ::HIS3MX6</i> , otherwise as JDY483                                              | This study |
| JDY1083 | <i>natNT2-pGAL(S)::mtr3</i> , otherwise as JDY483                                                                      | This study |
| JDY1084 | <i>natNT2-pGAL(L)::rrp42</i> , otherwise as JDY483                                                                     | This study |
| JDY1093 | <i>srp21::GFP-HIS3MX6</i> , otherwise as JDY895                                                                        | This study |
| JDY1156 | <i>air1Δ::kanMX6</i> , <i>air2Δ::natMX6</i> , <i>lhp1Δ::HIS3MX6</i> , otherwise as JDY895                              | This study |
| JDY1199 | <i>lhp1Δ::natNT2</i> otherwise as JDY335                                                                               | This study |
| JDY1201 | <i>rrp6Δ::natNT2</i> otherwise as JDY335                                                                               | This study |
| JDY1203 | <i>trf4Δ::kanMX6</i> otherwise as JDY335                                                                               | This study |
| JDY1239 | <i>rex1Δ::kanMX4</i> , <i>srp14Δ::HIS3</i> , <i>[rho-]</i> , <i>ura3</i> , <i>his3</i> , <i>leu2</i> *                 | This study |
| JDY1241 | <i>rrp44Δ::kanMX6</i> , pRS315- <i>rrp44-exo-HTP</i> , <i>srp14Δ::HIS3</i> , <i>ura3</i> , <i>his3</i> , <i>leu2</i> * | This study |

*Leung et al 2014 supplementary*

---

|       |                                                                                         |      |
|-------|-----------------------------------------------------------------------------------------|------|
| CS-66 | <i>rrp44</i> $\Delta$ :: <i>kanMX6</i> , pRS315- <i>RRP44-HTP</i> , otherwise as JDY895 | (3)  |
| CS-77 | <i>rrp44</i> :: <i>kanMX6</i> , pRS315- <i>rrp44-exo-HTP</i> , otherwise as JDY895      | (3)  |
| CS-31 | <i>trf4</i> :: <i>HTP-URA3</i> , otherwise as JDY895                                    | (50) |

---

\* The mating type of these strains has not been determined.

**SUPPLEMENTAL TABLE S2** The 3' terminus of scR1.

The 3' terminus of scR1 was inferred by reverse transcription-PCR after ligating a 3'-blocked DNA oligonucleotide onto RNA isolated from the cells indicated. PCR products were sequenced directly and, where indicated, cloned and sequenced individually. The genomic sequence at the 3' end of *SCR1* is:

...CATATTTTTTAACA... the run of 6 thymidines comprising the pol III terminator

| Genotype                     | RT-PCR product          | Cloned RT-PCR products                                                                                                                                                                                                                                                                 | No. of clones                                            |
|------------------------------|-------------------------|----------------------------------------------------------------------------------------------------------------------------------------------------------------------------------------------------------------------------------------------------------------------------------------|----------------------------------------------------------|
| wild type                    | ...CAUAUUUU(U)*         | ...CAUAUUUU<br>...CAUAUUUUU<br>...CAUAUUUUUU<br>...CAUAUUU<br>...CAUA                                                                                                                                                                                                                  | 11<br>6<br>1<br>1<br>1                                   |
| <i>lhp1</i> Δ                | ...CAUAU(U/A)(U/A)(U/A) | ...CAUAAAA<br>...CAUAU<br>...CAUAUAAA<br>...CAUAUU<br>...CAUAUUA<br>...CAUAUUAA<br>...CAUAUUAAA<br>...CAUAUUU<br>...CAUAUUUAA<br>...CAUAUUUU                                                                                                                                           | 2<br>2<br>1<br>3<br>2<br>1<br>4<br>4<br>4<br>1           |
| <i>lhp1</i> <sup>F51A</sup>  | ...CAUAU(U/A)(U/A)(U/A) |                                                                                                                                                                                                                                                                                        |                                                          |
| <i>rex1</i> Δ                | ...CAUAUUUUU(U)         | ...CAUAUUUU<br>...CAUAUUUUU<br>...CAUAUUUUUU                                                                                                                                                                                                                                           | 1<br>8<br>4                                              |
| <i>lhp1</i> Δ, <i>rex1</i> Δ | ...CAUAUU(U/A)(U/A)     | ...CAUAU<br>...CAUAUAAA<br>...CAUAUAAAA<br>...CAUAUU<br>...CAUAUUU<br>...CAUAUUUAA                                                                                                                                                                                                     | 6<br>2<br>1<br>2<br>1<br>1                               |
| <i>trf4</i> Δ                | ...CAUAU(UUUU)          | ...AAUUGUGC <sub>(420)</sub> <sup>†</sup><br>...CCAUCAGG <sub>(462)</sub><br>...UUGGCGGU <sub>(453)</sub><br>...CAUAU<br>...CAUAUA<br>...CAUAUU<br>...CAUAUUU<br>...CAUAUUUU<br>...CAUAUUUUU<br>...CAUAUUUUUU<br>...CAUAUUUUUA<br>...CAUAUUUUUU<br>...CAUAUUUUUUUAACAUUUU <sup>¶</sup> | 1<br>1<br>3<br>2<br>1<br>2<br>5<br>6<br>2<br>1<br>2<br>1 |
| <i>lhp1</i> Δ, <i>trf4</i> Δ | ...CAUAU(U)(U)(U)       | ...CUCGCACA <sub>(475)</sub><br>...GUGUGUC <sub>(507)</sub><br>...CAUAAAA<br>...CAUAU<br>...CAUAUU<br>...CAUAUUU<br>...CAUAUUUU                                                                                                                                                        | 1<br>1<br>1<br>10<br>1<br>2<br>4                         |

Leung et al 2014 supplementary

|                             |                         |                                                                                                                                       |                                                 |
|-----------------------------|-------------------------|---------------------------------------------------------------------------------------------------------------------------------------|-------------------------------------------------|
| <i>lhp1Δ, rrp6Δ</i>         | ...CAU <u>AU</u> (U)(U) | ...CAUAA<br>...CAUAAA<br>...CAUAAAA<br>...CAUAAAAA<br>...CAUAU<br>...CAUAUA<br>...CAUAUAA<br>...CAUAUAAA<br>...CAUAUUU                | 3<br>1<br>1<br>1<br>1<br>1<br>1<br>1<br>1       |
| <i>air1Δ, air2Δ</i>         | ...CAUAU                | ...CAU<br>...CAUA<br>...CAUAU<br>...CAUAUAA<br>...CAUAUU<br>...CAUAUUU<br>...CAUAUUUUU                                                | 1<br>4<br>10<br>1<br>2<br>1<br>3                |
| <i>air1Δ</i>                | ...CAUAUUUU(U)          |                                                                                                                                       |                                                 |
| <i>air2Δ</i>                | ...CAUAUUUU(U)          |                                                                                                                                       |                                                 |
| <i>rrp6Δ</i>                | ...CAUAU(U/A)(U/A)      | ...CAUAAAA<br>...CAUAU<br>...CAUAUAAA<br>...CAUAUU<br>...CAUAUUAA<br>...CAUAUUU<br>...CAUAUUUU                                        | 1<br>3<br>2<br>2<br>2<br>1<br>1                 |
| <i>rrp6<sup>D238N</sup></i> | ...CAUAU(U/A)(U/A)      | ...CAUAAAAA<br>...CAUAU<br>...CAUAUAAA<br>...CAUAUUAAA<br>...CAUAUUUUU<br>...CAUAUUUUUU                                               | 1<br>4<br>2<br>1<br>1<br>1                      |
| <i>rrp44-exo</i>            | ...CAUAU(U)(U)          | ...CAU<br>...CAUA<br>...CAUAAAA<br>...CAUAU<br>...CAUAUU<br>...CAUAUUAA<br>...CAUAUUU<br>...CAUAUUUU<br>...CAUAUUUUAA<br>...CAUAUUUUU | 1<br>1<br>3<br>10<br>2<br>1<br>4<br>2<br>1<br>5 |
| <i>rrp44-endo</i>           | ...CAUAUUUU(U)          |                                                                                                                                       |                                                 |
| <i>rrp44-exo, rrp6Δ</i>     | ...CAUAU(U)(U)          | ...CAUA<br>...CAUAU<br>...CAUAUU<br>...CAUAUUUU<br>...CAUAUUUUU                                                                       | 1<br>1<br>1<br>1<br>1                           |
| <i>lsm4Δ</i>                | ...CAUAUUUU(U)          |                                                                                                                                       |                                                 |
| <i>lsm5Δ</i>                | ...CAUAUUUU(U)          |                                                                                                                                       |                                                 |
| <i>lsm6Δ</i>                | ...CAUAUUUU(U)          |                                                                                                                                       |                                                 |
| <i>lsm7Δ</i>                | ...CAUAUUUU(U)          |                                                                                                                                       |                                                 |

\* Bracketed nucleotides indicate heterogeneity of the 3' end with either alternative nucleotides at a given position, or that the sequence indicated the presence of a

particular nucleotide (such as the 5<sup>th</sup> U in wild type scR1) in only part of the cDNA product.

† numbers in brackets refer to final nucleotide of scR1 present in the clone sequenced.

¶ this clone extends beyond the terminator of scR1 into the next stretch of T's in the template.

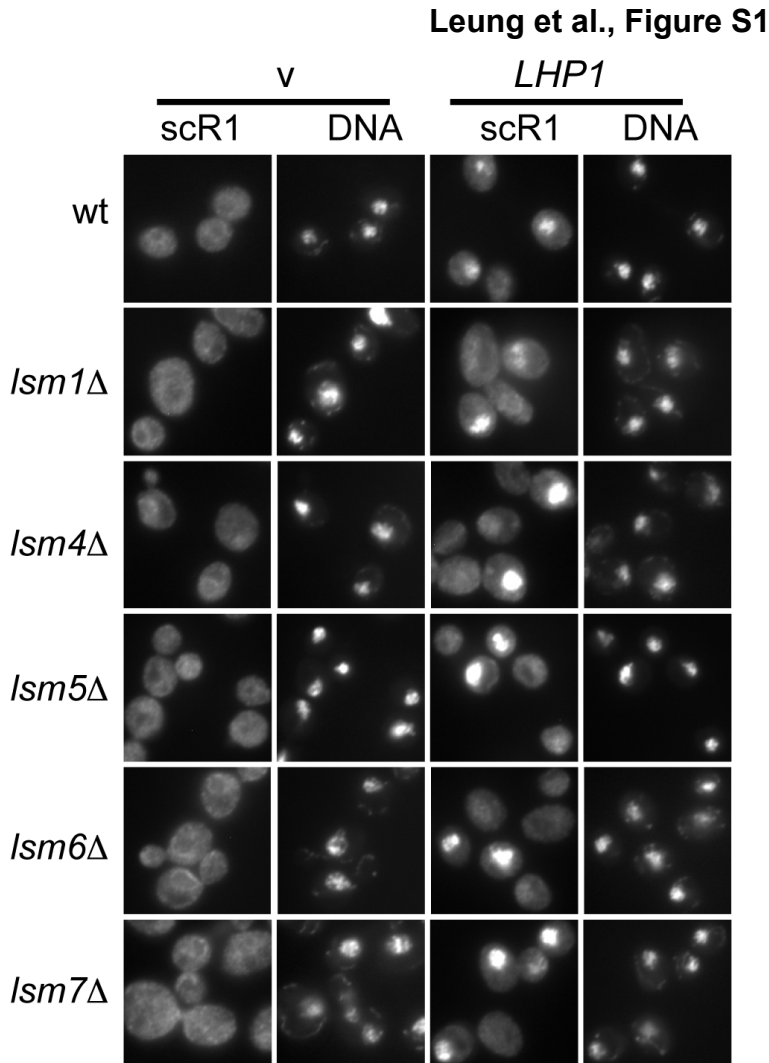

**Figure S1 The nuclear LSM complex is not required for correct localisation of scR1, or for its nuclear accumulation on over-expression of Lhp1.**

Fluorescence *in situ* hybridisation (FISH) was carried out on the cells indicated, which contained high copy (2 $\mu$ ) plasmids that were either empty (*v*) or contained *LHP1*, using fluorescently labelled probe scR1A (scR1). DNA was stained with DAPI (DNA). Lsm1 is exclusively part of the cytoplasmic Lsm complex, and provided a control, whereas Lsm4-7 are components of both the cytoplasmic and

nuclear Lsm complexes. Individual channels are shown. Fluorescence images of cells were captured as described (Materials and Methods).

#### SUPPLEMENTARY REFERENCES

77. Sikorski, R.S. and Hieter, P. (1989) A system of shuttle vectors and yeast host strains designed for efficient manipulation of DNA in *Saccharomyces cerevisiae*. *Genetics*, **122**, 19-27.
78. Christianson, T.W., Sikorski, R.S., Dante, M., Shero, J.H. and Hieter, P. (1992) Multifunctional yeast high-copy-number shuttle vectors. *Gene*, **110**, 119-122.
79. Stirling, C.J. and Hewitt, E.W. (1992) The *Saccharomyces cerevisiae* *SEC65* gene encodes a component of the yeast signal recognition particle with homology to human SRP19. *Nature*, **356**, 534-537.
80. Brachmann, C.B., Davies, A., Cost, G.J., Caputo, E., Li, J., Hieter, P. and Boeke, J.D. (1998) Designer deletion strains derived from *Saccharomyces cerevisiae* S288C: a useful set of strains and plasmids for PCR-mediated gene disruption and other applications. *Yeast*, **14**, 115-32.
